# Supplementary material for: Targeting BRAF Class II and III Mutations in NSCLC with the pan-RAF inhibitor Exarafenib Reveals ARAF-KSR1-Mediated Resistance and Rational Combination Strategies
Source: Research Square preprint supplement (doi:10.21203/rs.3.rs-5135027/v1), 2025-10-09
Supplement: Supplementary file 1 [file cba69c1622c97adc400c8716.xlsx]

## Sheet: Supp. Data 1_1L
	Table 1.A: Treatment Landscape for 1L, BRAF CLASS I, NSCLC (n=307 patients)					Table 1.B: Treatment Landscape for 1L, BRAF CLASS II, NSCLC (n=271 patients)					Table 1.C: Treatment Landscape for 1L, BRAF CLASS III, NSCLC (n=251 patients)
	Regimen	Frequency	Percent			Regimen	Frequency	Percent			Regimen	Frequency	Percent
	trametinib + dabrafenib	73	23.78			carboplatin + pemetrexed + pembrolizumab	53	19.56			carboplatin + pemetrexed + pembrolizumab	45	17.93
	pembrolizumab	45	14.66			pembrolizumab	41	15.13			pembrolizumab	44	17.53
	carboplatin + pemetrexed + pembrolizumab	33	10.75			carboplatin + pemetrexed	27	9.96			carboplatin + pemetrexed	27	10.76
	carboplatin + pemetrexed	25	8.14			osimertinib	19	7.01			carboplatin + paclitaxel	15	5.98
	osimertinib	15	4.89			nivolumab	16	5.9			osimertinib	15	5.98
	nivolumab	14	4.56			carboplatin + paclitaxel	15	5.54			nivolumab	14	5.58
	carboplatin + paclitaxel	9	2.93			docetaxel + ramucirumab	6	2.21			carboplatin + paclitaxel + pembrolizumab	8	3.19
	dabrafenib	9	2.93			erlotinib	6	2.21			gemcitabine	7	2.79
	bevacizumab	7	2.28			atezolizumab	5	1.85			pemetrexed + pembrolizumab	7	2.79
	pemetrexed	6	1.95			carboplatin + paclitaxel + pembrolizumab	5	1.85			erlotinib	6	2.39
	trametinib	6	1.95			gemcitabine	5	1.85			pemetrexed	6	2.39
	carboplatin + pemetrexed + bevacizumab	5	1.63			pemetrexed + pembrolizumab	5	1.85			docetaxel + ramucirumab	5	1.99
	docetaxel + ramucirumab	5	1.63			docetaxel	4	1.48			bevacizumab	3	1.2
	pemetrexed + bevacizumab	4	1.3			carboplatin	3	1.11			carboplatin + pembrolizumab + abraxane	3	1.2
	carboplatin + abraxane	3	0.98			carboplatin + docetaxel + pemetrexed + pembrolizumab	3	1.11			docetaxel	3	1.2
	carboplatin + paclitaxel + pembrolizumab	3	0.98			carboplatin + etoposide	3	1.11			trametinib + dabrafenib	3	1.2
	erlotinib	3	0.98			carboplatin + gemcitabine	3	1.11			vinorelbine	3	1.2
	gemcitabine	3	0.98			carboplatin + pemetrexed + bevacizumab	3	1.11			carboplatin + gemcitabine	2	0.8
	afatinib	2	0.65			cisplatin + pemetrexed	3	1.11			carboplatin + paclitaxel + abraxane	2	0.8
	alectinib	2	0.65			ipilimumab + nivolumab	3	1.11			carboplatin + paclitaxel + pembrolizumab + abraxane	2	0.8
	atezolizumab	2	0.65			pemetrexed	3	1.11			carboplatin + pemetrexed + bevacizumab	2	0.8
	carboplatin + gemcitabine	2	0.65			trametinib + dabrafenib	3	1.11			docetaxel + nivolumab	2	0.8
	docetaxel	2	0.65			carboplatin + paclitaxel + atezolizumab + bevacizumab	2	0.74			pemetrexed + bevacizumab	2	0.8
	ipilimumab + nivolumab	2	0.65			crizotinib	2	0.74			abraxane	1	0.4
	pemetrexed + pembrolizumab	2	0.65			docetaxel + nivolumab	2	0.74			alectinib	1	0.4
	trametinib + dabrafenib + osimertinib	2	0.65			docetaxel + pembrolizumab	2	0.74			alectinib + brigatinib	1	0.4
	abraxane	1	0.33			ipilimumab	2	0.74			cabozantinib	1	0.4
	capmatinib	1	0.33			paclitaxel + abraxane	2	0.74			carboplatin + docetaxel + paclitaxel + pembrolizumab	1	0.4
	carboplatin	1	0.33			abraxane	1	0.37			carboplatin + docetaxel + pemetrexed + pembrolizumab	1	0.4
	carboplatin + cisplatin + pemetrexed	1	0.33			alectinib	1	0.37			carboplatin + etoposide + erlotinib	1	0.4
	carboplatin + docetaxel	1	0.33			bevacizumab	1	0.37			carboplatin + paclitaxel + atezolizumab	1	0.4
	carboplatin + docetaxel + pembrolizumab	1	0.33			capmatinib	1	0.37			carboplatin + paclitaxel + atezolizumab + bevacizumab	1	0.4
	carboplatin + etoposide + atezolizumab	1	0.33			carboplatin + cisplatin + pemetrexed	1	0.37			carboplatin + paclitaxel + pemetrexed + pembrolizumab	1	0.4
	carboplatin + paclitaxel + atezolizumab + bevacizumab	1	0.33			carboplatin + docetaxel + paclitaxel	1	0.37			carboplatin + pemetrexed + abraxane	1	0.4
	carboplatin + paclitaxel + atezolizumab + bevacizumab + abraxane	1	0.33			carboplatin + docetaxel + pemetrexed	1	0.37			carboplatin + pemetrexed + ipilimumab + nivolumab	1	0.4
	carboplatin + paclitaxel + bevacizumab	1	0.33			carboplatin + paclitaxel + abraxane	1	0.37			carboplatin + pemetrexed + osimertinib + bevacizumab	1	0.4
	carboplatin + paclitaxel + pembrolizumab + abraxane	1	0.33			carboplatin + paclitaxel + pembrolizumab + abraxane	1	0.37			cisplatin	1	0.4
	carboplatin + paclitaxel + pemetrexed + atezolizumab + abraxane	1	0.33			carboplatin + paclitaxel + pemetrexed	1	0.37			cisplatin + pemetrexed	1	0.4
	carboplatin + pemetrexed + erlotinib	1	0.33			carboplatin + paclitaxel + pemetrexed + bevacizumab	1	0.37			cisplatin + pemetrexed + bevacizumab	1	0.4
	cisplatin + pemetrexed	1	0.33			carboplatin + pemetrexed + ipilimumab + nivolumab	1	0.37			ipilimumab	1	0.4
	crizotinib + trametinib + dabrafenib + bevacizumab	1	0.33			docetaxel + erlotinib	1	0.37			ipilimumab + nivolumab	1	0.4
	docetaxel + pemetrexed + pembrolizumab	1	0.33			docetaxel + gemcitabine	1	0.37			nivolumab + dabrafenib	1	0.4
	durvalumab	1	0.33			docetaxel + trametinib + dabrafenib	1	0.37			paclitaxel	1	0.4
	gemcitabine + pemetrexed	1	0.33			durvalumab	1	0.37			paclitaxel + abraxane	1	0.4
	ipilimumab	1	0.33			erlotinib + cabozantinib	1	0.37			paclitaxel + bevacizumab + abraxane	1	0.4
	lorlatinib	1	0.33			erlotinib + osimertinib	1	0.37			paclitaxel + pemetrexed + pembrolizumab + abraxane	1	0.4
	osimertinib + larotrectinib	1	0.33			paclitaxel + ramucirumab + abraxane	1	0.37			pembrolizumab + abraxane	1	0.4
	pemetrexed + durvalumab	1	0.33			pembrolizumab + abraxane	1	0.37			pemetrexed + nivolumab	1	0.4
	pemetrexed + trametinib + dabrafenib	1	0.33			pemetrexed + bevacizumab	1	0.37
						pemetrexed + osimertinib	1	0.37
						pemetrexed + trametinib + dabrafenib	1	0.37
						pemetrexed + vinorelbine	1	0.37
						trametinib	1	0.37

## Sheet: Supp. Data 2_2L
	Table 2.A: Treatment Landscape for 2L, BRAF CLASS I, NSCLC (n=307 patients)					Table 2.B: Treatment Landscape for 2L, BRAF CLASS II, NSCLC (n=271 patients)					Table 2.C: Treatment Landscape for 2L, BRAF CLASS III, NSCLC (n=251 patients)
	Regimen	Frequency	Percent			Regimen	Frequency	Percent			Regimen	Frequency	Percent
	trametinib + dabrafenib	14	4.56026			nivolumab	18	6.64207			nivolumab	15	5.9761
	pembrolizumab	9	2.9316			durvalumab	10	3.69004			carboplatin + pemetrexed + pembrolizumab	6	2.39044
	carboplatin + pemetrexed + pembrolizumab	7	2.28013			pembrolizumab	9	3.32103			docetaxel + ramucirumab	6	2.39044
	carboplatin + pemetrexed	5	1.62866			docetaxel + ramucirumab	6	2.21402			durvalumab	6	2.39044
	atezolizumab	4	1.30293			carboplatin + pemetrexed	4	1.47601			atezolizumab	4	1.59363
	docetaxel + ramucirumab	4	1.30293			pemetrexed + pembrolizumab	4	1.47601			pembrolizumab	4	1.59363
	durvalumab	3	0.977199			carboplatin + pemetrexed + pembrolizumab	3	1.10701			carboplatin + pemetrexed + bevacizumab	3	1.19522
	pemetrexed	3	0.977199			gemcitabine	3	1.10701			abraxane	2	0.796813
	pemetrexed + pembrolizumab	3	0.977199			trametinib + dabrafenib	3	1.10701			carboplatin + paclitaxel + bevacizumab	2	0.796813
	trametinib	3	0.977199			atezolizumab	2	0.738007			carboplatin + pemetrexed	2	0.796813
	carboplatin + paclitaxel	2	0.651466			osimertinib	2	0.738007			erlotinib + osimertinib	2	0.796813
	dabrafenib	2	0.651466			carboplatin	1	0.369004			gemcitabine	2	0.796813
	gemcitabine	2	0.651466			carboplatin + docetaxel + pemetrexed	1	0.369004			ipilimumab + nivolumab	2	0.796813
	nivolumab	2	0.651466			carboplatin + gemcitabine + nivolumab	1	0.369004			osimertinib	2	0.796813
	trametinib + dabrafenib + osimertinib	2	0.651466			carboplatin + paclitaxel	1	0.369004			bevacizumab	1	0.398406
	alectinib + trametinib	1	0.325733			carboplatin + paclitaxel + pembrolizumab + abraxane	1	0.369004			carboplatin + docetaxel	1	0.398406
	bevacizumab + abraxane	1	0.325733			carboplatin + pemetrexed + bevacizumab	1	0.369004			carboplatin + docetaxel + paclitaxel + ramucirumab	1	0.398406
	carboplatin + abraxane	1	0.325733			carboplatin + pemetrexed + osimertinib	1	0.369004			carboplatin + docetaxel + pemetrexed + pembrolizumab	1	0.398406
	carboplatin + ipilimumab + nivolumab	1	0.325733			docetaxel + gemcitabine + vinorelbine	1	0.369004			carboplatin + paclitaxel + pembrolizumab	1	0.398406
	carboplatin + paclitaxel + atezolizumab + bevacizumab	1	0.325733			docetaxel + pembrolizumab	1	0.369004			carboplatin + paclitaxel + pembrolizumab + trametinib + dabrafenib	1	0.398406
	carboplatin + paclitaxel + pembrolizumab	1	0.325733			erlotinib	1	0.369004			carboplatin + pemetrexed + osimertinib	1	0.398406
	carboplatin + paclitaxel + pembrolizumab + abraxane	1	0.325733			gemcitabine + abraxane	1	0.369004			docetaxel + pembrolizumab	1	0.398406
	carboplatin + pembrolizumab + abraxane	1	0.325733			gemcitabine + vinorelbine	1	0.369004			docetaxel + pemetrexed + bevacizumab	1	0.398406
	carboplatin + pemetrexed + bevacizumab	1	0.325733			ipilimumab + nivolumab	1	0.369004			ipilimumab	1	0.398406
	carboplatin + pemetrexed + dabrafenib + osimertinib	1	0.325733			nivolumab + osimertinib	1	0.369004			pemetrexed	1	0.398406
	carboplatin + pemetrexed + lorlatinib + bevacizumab	1	0.325733			paclitaxel + atezolizumab + capmatinib + abraxane	1	0.369004			pemetrexed + bevacizumab	1	0.398406
	carboplatin + pemetrexed + nivolumab + trametinib + dabrafenib	1	0.325733			pemetrexed + bevacizumab	1	0.369004			vinorelbine	1	0.398406
	carboplatin + pemetrexed + pembrolizumab + osimertinib + larotrectinib	1	0.325733				80					71
	docetaxel + crizotinib + trametinib + dabrafenib + ramucirumab	1	0.325733
	docetaxel + pembrolizumab	1	0.325733
	erlotinib	1	0.325733
	paclitaxel	1	0.325733
	paclitaxel + abraxane	1	0.325733
	pembrolizumab + trametinib + dabrafenib	1	0.325733
	pemetrexed + bevacizumab	1	0.325733
	trametinib + osimertinib	1	0.325733
		86

## Sheet: Supp. Data 3_3L
	Table 3.A: Treatment Landscape for 3L, BRAF CLASS I, NSCLC (n=307 patients)					Table 3.B: Treatment Landscape for 3L, BRAF CLASS II, NSCLC (n=271 patients)					Table 3.C: Treatment Landscape for 3L, BRAF CLASS III, NSCLC (n=251 patients)
	Regimen	Frequency	Percent			Regimen	Frequency	Percent			Regimen	Frequency	Percent
	carboplatin + pemetrexed	2	0.651466			carboplatin + paclitaxel	3	1.10701			carboplatin + pemetrexed	3	1.19522
	gemcitabine	2	0.651466			pembrolizumab	3	1.10701			carboplatin + paclitaxel + abraxane	2	0.796813
	afatinib	1	0.325733			carboplatin + pemetrexed	2	0.738007			nivolumab	2	0.796813
	carboplatin + paclitaxel + atezolizumab + bevacizumab	1	0.325733			gemcitabine	2	0.738007			osimertinib	2	0.796813
	carboplatin + pembrolizumab + abraxane	1	0.325733			afatinib	1	0.369004			pemetrexed	2	0.796813
	carboplatin + pemetrexed + trametinib + dabrafenib	1	0.325733			atezolizumab	1	0.369004			carboplatin + abraxane	1	0.398406
	cisplatin + pemetrexed	1	0.325733			bevacizumab	1	0.369004			ceritinib	1	0.398406
	docetaxel	1	0.325733			carboplatin + gemcitabine + pembrolizumab + abraxane	1	0.369004			docetaxel + ramucirumab	1	0.398406
	docetaxel + pembrolizumab + trametinib + dabrafenib	1	0.325733			carboplatin + paclitaxel + bevacizumab	1	0.369004			erlotinib	1	0.398406
	docetaxel + ramucirumab	1	0.325733			carboplatin + paclitaxel + pembrolizumab	1	0.369004			gemcitabine	1	0.398406
	ipilimumab	1	0.325733			crizotinib	1	0.369004			gemcitabine + paclitaxel	1	0.398406
	paclitaxel	1	0.325733			nivolumab	1	0.369004			ipilimumab	1	0.398406
	pembrolizumab	1	0.325733			nivolumab + bevacizumab	1	0.369004			paclitaxel	1	0.398406
	pemetrexed	1	0.325733			osimertinib	1	0.369004			paclitaxel + abraxane	1	0.398406
	pemetrexed + bevacizumab	1	0.325733			paclitaxel + atezolizumab + bevacizumab	1	0.369004			pemetrexed + pembrolizumab	1	0.398406
	pemetrexed + osimertinib	1	0.325733			pemetrexed	1	0.369004			trametinib + dabrafenib	1	0.398406
	trametinib + dabrafenib	1	0.325733			pemetrexed + bevacizumab	1	0.369004				22
	trametinib + dabrafenib + bevacizumab	1	0.325733			trametinib + dabrafenib	1	0.369004
		20					24

## Sheet: Supp. Data 4_Co-occuring Mut
	Co-occurring mutation detection rate by BRAF Class, NSCLC
			Class I (n=845)		Class II (n=810)		Class III (n=743)
	Gene	Alteration	# Patients	Percent	# Patients	Percent	# Patients	Percent
	HRAS	HRAS G13R	1	0.118343	3	0.37037	1	0.13459
	HRAS	HRAS G12D	1	0.118343	0	0	0	0
	HRAS	HRAS Q61L	1	0.118343	0	0	0	0
	HRAS	HRAS Q61R	0	0	1	0.123457	2	0.269179
	HRAS	HRAS G12V	0	0	1	0.123457	0	0
	HRAS	HRAS G13V	0	0	1	0.123457	0	0
	HRAS	HRAS Q61K	0	0	1	0.123457	0	0
	KRAS	KRAS G12D	12	1.42012	16	1.97531	16	2.15343
	KRAS	KRAS G12V	10	1.18343	15	1.85185	23	3.09556
	KRAS	KRAS G13D	9	1.06509	4	0.493827	9	1.21131
	KRAS	KRAS G12C	8	0.946746	42	5.18519	33	4.44145
	KRAS	KRAS G12R	7	0.828402	8	0.987654	4	0.538358
	KRAS	KRAS Q61H	4	0.473373	9	1.11111	7	0.942127
	KRAS	KRAS G12S	3	0.35503	5	0.617284	8	1.07672
	KRAS	KRAS G12A	3	0.35503	7	0.864198	7	0.942127
	KRAS	KRAS Q61R	3	0.35503	1	0.123457	0	0
	KRAS	KRAS G13C	1	0.118343	20	2.46914	14	1.88425
	KRAS	KRAS Q61L	1	0.118343	2	0.246914	1	0.13459
	KRAS	KRAS Q61K	0	0	0	0	1	0.13459
	NRAS	NRAS Q61R	3	0.35503	1	0.123457	5	0.672948
	NRAS	NRAS Q61K	3	0.35503	5	0.617284	4	0.538358
	NRAS	NRAS G12D	2	0.236686	7	0.864198	11	1.48048
	NRAS	NRAS G13R	1	0.118343	4	0.493827	3	0.403769
	NRAS	NRAS Q61L	1	0.118343	4	0.493827	3	0.403769
	NRAS	NRAS G12S	1	0.118343	1	0.123457	1	0.13459
	NRAS	NRAS G13S	1	0.118343	0	0	0	0
	NRAS	NRAS G12V	0	0	2	0.246914	2	0.269179
	NRAS	NRAS G13D	0	0	1	0.123457	2	0.269179
	NRAS	NRAS G13V	0	0	2	0.246914	1	0.13459
	NRAS	NRAS G12A	0	0	1	0.123457	1	0.13459
	NRAS	NRAS Q61H	0	0	1	0.123457	1	0.13459
	NRAS	NRAS G12C	0	0	2	0.246914	0	0
	NRAS	NRAS G12R	0	0	1	0.123457	0	0
		Sum	76	8.99408	168	20.7407	160	21.5343
